# Supplementary material for: Fathers matter: male body mass affects life-history traits in a size-dimorphic seabird
Source: PubMed Central journal article supplement (PMC5443952; doi:10.1098/rspb.2017.0397), 2017-05-03
Supplement: rspb20170397supp1.pdf [file rspb20170397supp1.pdf]

# 1 ***Supplementary Information***

## 2 **SI1 Mass standardization functions**

### 3 *Adult mass*

4 The adult mass standardization function describes adult mass as a function of sex, age, year,  
5 status, and number of days into breeding stage for pre-breeding, incubation and chick rearing.  
6 Unless specified otherwise, analyses were performed in R (version 3.0.2, [1]). A generalized  
7 additive mixed model (GAMM) was fitted with the package mgcv (version 1.8-6, [2]) to  
8 account for nonlinearity with full tensor product smooths for fixed continuous effects and  
9 with individual ID and year as a random effects.

### 10 *Chick mass*

11 Between 1999 and 2008, 412 sexed chicks were weighed around the period of peak chick  
12 mass [3]. We built a chick mass standardisation function to estimate mass at a given day of  
13 the year by fitting a GAMM with chick mass as dependent on sex, day of year and year of  
14 birth as fixed effects with full tensor product smooths for the day of the year, and chick ID as  
15 a random effect. Chick mass was standardised to the 30<sup>th</sup> September of their birth year, the  
16 date at which most mass measurements were taken.

17 **SI Table 1: The estimates of the categorical factors of the GAM used to standardize adult mass.**

|                              | Estimate | SE      | t     | p-value |
|------------------------------|----------|---------|-------|---------|
| Intercept (chick rearing, F) | 7752.92  | 317.61  | 24.41 |         |
| Year 1989                    | -1129.17 | 276.41  | -4.09 | <0.001  |
| Year 1990                    | -878.33  | 270.73  | -3.24 | 0.001   |
| Year 1991                    | -996.99  | 644.63  | -1.55 | 0.122   |
| Year 1992                    | -800.43  | 281.31  | -2.85 | 0.005   |
| Year 1998                    | 141.46   | 292.78  | 0.48  | 0.629   |
| Year 1999                    | -976.36  | 289.99  | -3.37 | 0.001   |
| Year 2000                    | -340.58  | 565.84  | -0.60 | 0.547   |
| Year 2001                    | -387.63  | 279.28  | -1.39 | 0.166   |
| Year 2002                    | -649.13  | 291.68  | -2.23 | 0.026   |
| Year 2003                    | -674.87  | 275.34  | -2.45 | 0.014   |
| Year 2004                    | -570.66  | 307.38  | -1.86 | 0.064   |
| Year 2005                    | 163.49   | 379.51  | 0.43  | 0.667   |
| Year 2008                    | -502.92  | 332.03  | -1.52 | 0.130   |
| Year 2009                    | 9.36     | 325.54  | 0.03  | 0.977   |
| Year 2011                    | -749.56  | 300.28  | -2.50 | 0.013   |
| Year 2012                    | -420.37  | 314.11  | -1.34 | 0.181   |
| Year 2013                    | -622.41  | 300.01  | -2.08 | 0.038   |
| Sex (M)                      | 1762.54  | 61.91   | 28.47 | <0.001  |
| Incubating                   | 1098.48  | 192.02  | 5.72  | <0.001  |
| Not breeding                 | 962.62   | 233.34  | 4.13  | <0.001  |
| Pre-breeding                 | 1459.91  | 326.97  | 4.47  | <0.001  |
| Immature                     | -1794.19 | 1872.04 | -0.96 | 0.338   |

18

19

20 **SI Table 2: The estimates of smooth functions of the continuous predictors and the random effect of the GAM used to**  
 21 **standardize adult mass. The abbreviations adu stands for adult, imm for immatures, inc. for incubation, nbr for**  
 22 **number and rear. for rearing.**

|                              | Edf    | Ref.df | F     | p-value |
|------------------------------|--------|--------|-------|---------|
| Age (Adu)                    | 2.25   | 2.64   | 7.65  | <0.001  |
| Age (Imm)                    | 1.90   | 1.97   | 6.42  | 0.002   |
| nbr of days into inc.        | 3.50   | 3.85   | 11.46 | <0.001  |
| nbr of days into chick rear. | 2.28   | 2.58   | 12.43 | <0.001  |
| ID (random effect)           | 260.78 | 648.00 | 0.70  | <0.001  |

23

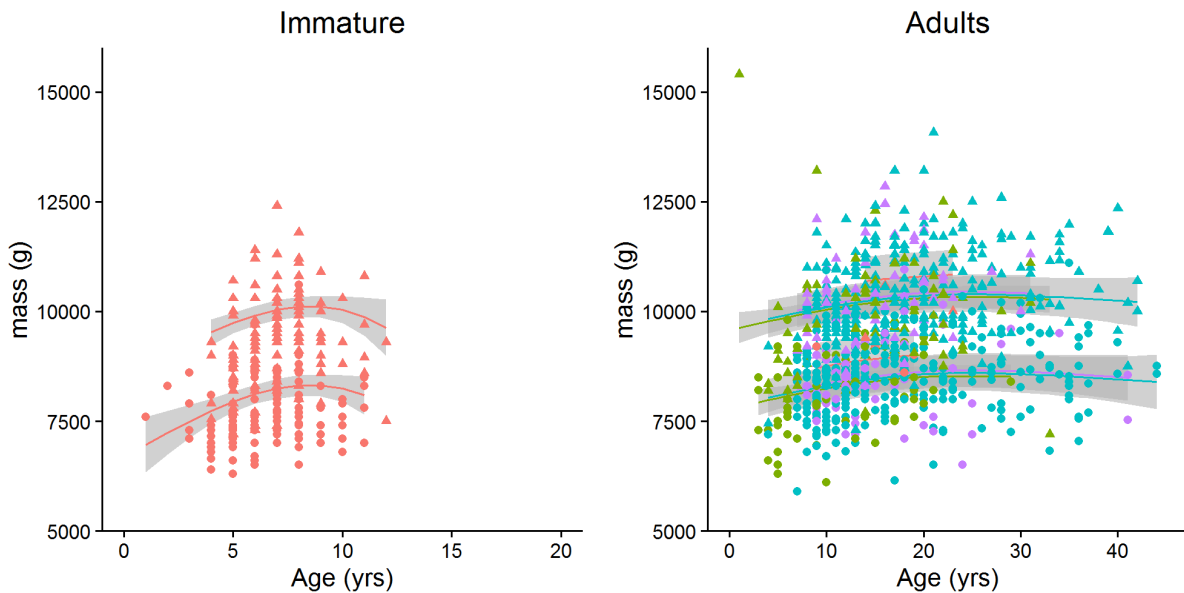

24

25 **SI Figure 1: The relationship between age and mass as predicted by mass standardization function. On the right**  
 26 **graph is the relationship for adults and on the left for immature birds. Points are original data: triangles for males**  
 27 **and circles for females. In the right graph, the different colours reflect the state of the individual: pre-breeder are in**  
 28 **orange, non-breeder in green, incubating individuals are in blue and chick rearing breeders are in green. Predicted**  
 29 **values (lines) have been estimated for year 2001 at the first day of incubation, and chick rearing respectively.**

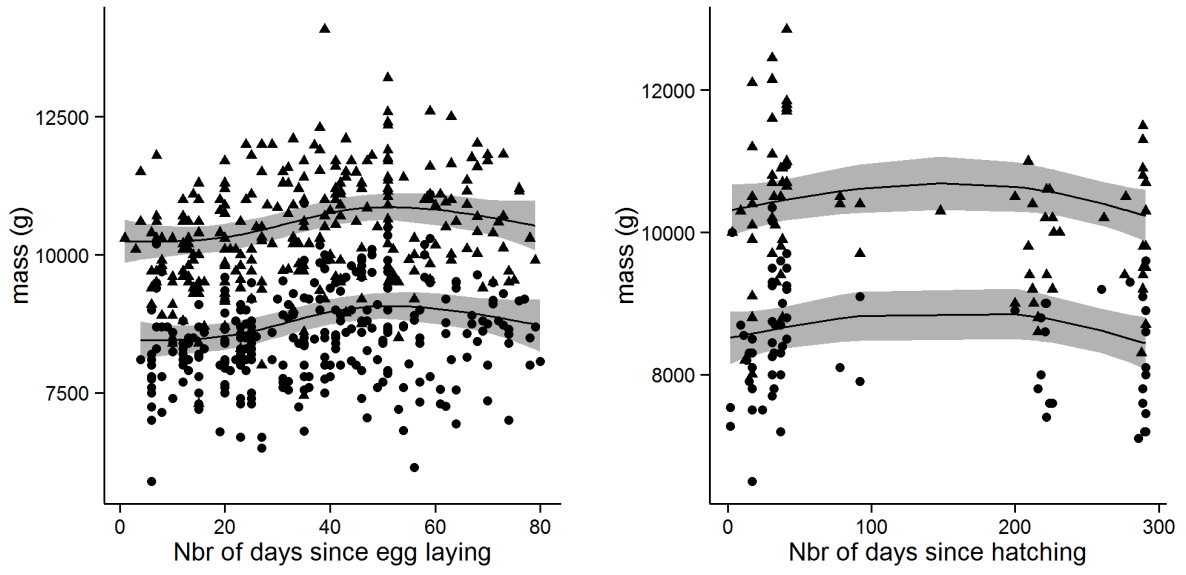

30

31 **SI Figure 1: The relationship between mass and the number of days into incubation (left) and number of days into**  
 32 **chick rearing (right) as predicted by the mass standardization functions. Points are observed data: triangles for males**  
 33 **and circles for females. Predicted values (lines) have been estimated for year 2001 and for mean age (14 years old).**  
 34 **The grey shaded area is the 95% confidence interval.**

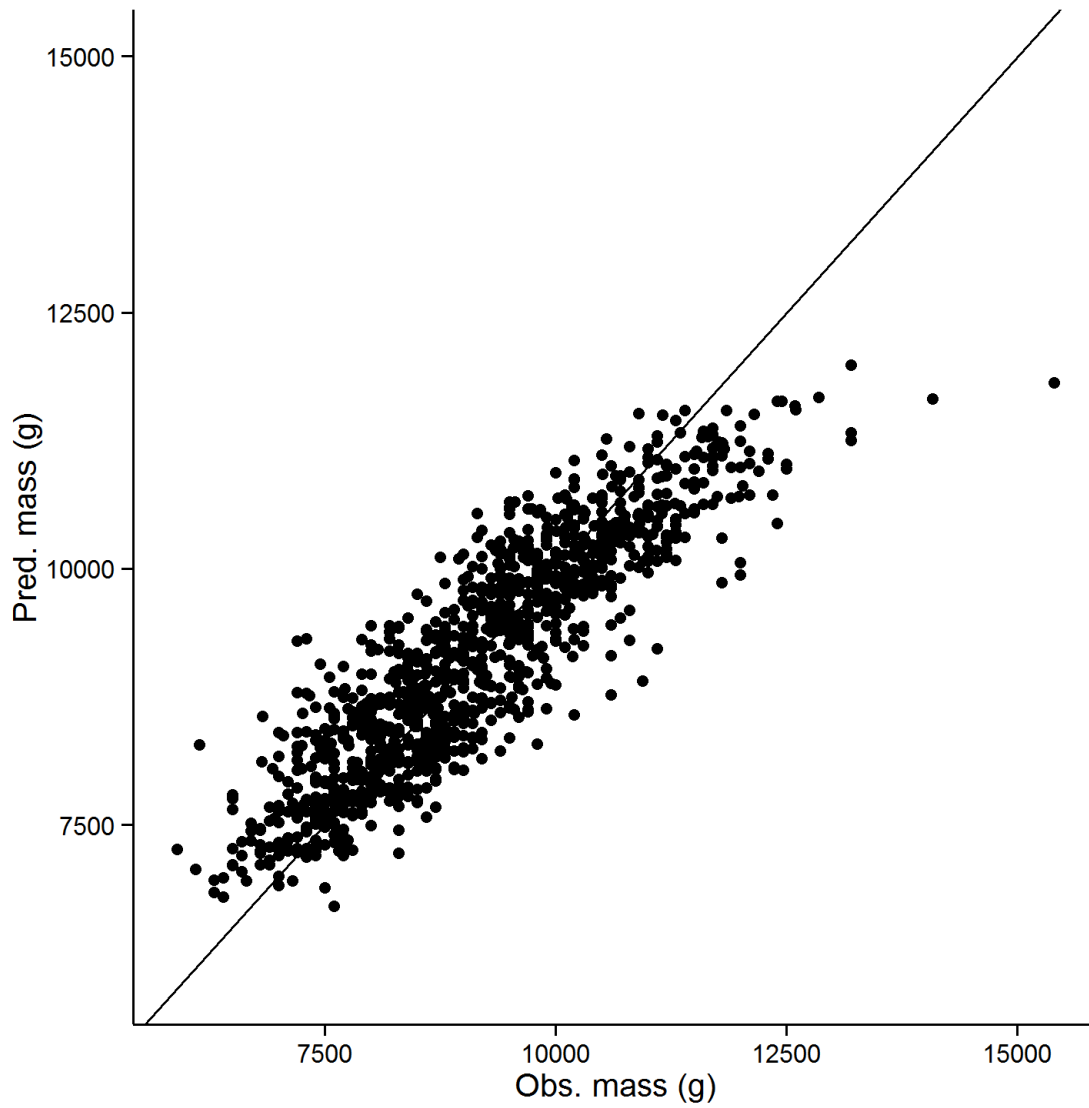

35

36 **SI Figure 2: Relationship between predicted mass and observed mass as based on the model to standardize mass. The**  
37 **line is the 1:1 line.**

38 **SI Table 3: The estimates of the categorical factors of the GAM used to standardize chick mass.**

|           | Estimate | SE     | t     | p      |
|-----------|----------|--------|-------|--------|
| Intercept | 10583.83 | 170.79 | 61.97 | <0.001 |
| Sex(M)    | 1530.07  | 129.26 | 11.84 | <0.001 |
| Year 2000 | -99.97   | 381.72 | -0.26 | 0.794  |
| Year 2001 | 16.38    | 383.33 | 0.04  | 0.966  |
| Year 2002 | 795.93   | 321.87 | 2.47  | 0.014  |
| Year 2003 | -86.11   | 199.60 | -0.43 | 0.666  |
| Year 2004 | 80.87    | 260.61 | 0.31  | 0.757  |
| Year 2005 | 490.07   | 258.34 | 1.90  | 0.059  |
| Year 2006 | 2108.48  | 631.48 | 3.34  | 0.001  |
| Year 2007 | 212.32   | 258.95 | 0.82  | 0.413  |
| Year 2008 | -36.42   | 282.96 | -0.13 | 0.898  |

39

40 **SI Table 4: The estimates of smooth functions of the continuous predictors and the random effect of the GAM used to**  
 41 **standardize chick mass.**

|                                  | edf    | Ref.df | F      | p-value |
|----------------------------------|--------|--------|--------|---------|
| Days since beginning of the year | 3.521  | 3.77   | 3.52   | <0.001  |
| ID (random effect)               | 159.25 | 401    | 159.26 | <0.001  |

42

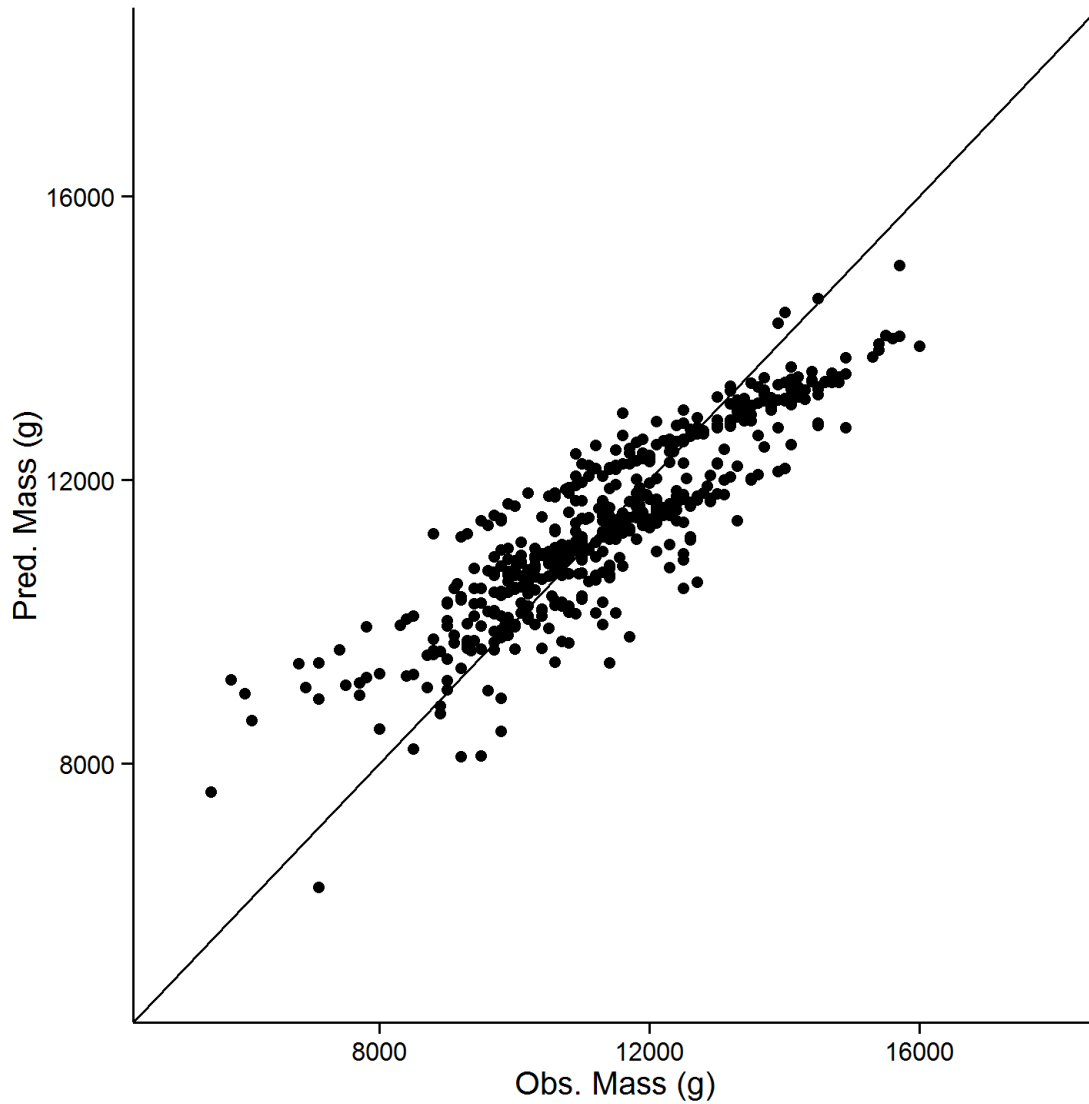

43

44 SI Figure 3: Relationship between predicted and observed chick mass as based on the model to standardized chick  
 45 mass. The line is the 1:1 line.

46 ***Literature***

- 47 1. R Core Team 2016 R: A language and environment for statistical computing. *R Dev.*  
 48 *Core Team.*
- 49 2. Wood, S. N. 2011 Fast stable restricted maximum likelihood and marginal likelihood  
 50 estimation of semiparametric generalized linear models. *J. R. Stat. Soc. Ser. B Stat.*

51 *Methodol.* **73**, 3–36.

52 3. Weimerskirch, H. & Lys, P. 2000 Seasonal changes in the provisioning behaviour and  
53 mass of male and female wandering albatrosses in relation to the growth of their chick.

54 *Polar Biol.* **23**, 733–744.

55
