# Supplementary material for: Fathers matter: male body mass affects life-history traits in a size-dimorphic seabird
Source: PubMed Central journal article supplement (PMC5443952; doi:10.1098/rspb.2017.0397), 2017-05-03
Supplement: rspb20170397supp2.pdf [file rspb20170397supp2.pdf]

# 1 ***Supplementary Information***

## 2 **SI2 Adult survival**

3 To estimate the effect of mass on adult survival, we modified adult encounter histories such  
4 that individuals entered the population the year they were weighed. For example, the  
5 encounter history of an individual born in 1990 but weighed in 1999 started only in 1999,  
6 even if the individual was re-sighted earlier. This approach allowed individual-based analysis  
7 when most individuals are only weighed once throughout their life time.

8 As the wandering albatross is a non-obligate biennial breeder, successive capture events are  
9 not independent. To account for this, we implemented an Immediate Trap Effect on Capture  
10 model (ITEC) [1]; individuals are either trap aware if they have been captured at the  
11 immediate previous occasion or trap unaware if not. We defined a sex and mass-dependent  
12 survival process and sex-specific trap-awareness process depending on the previous state  
13 (aware/unaware).

14 The transition matrix is the multiplication of the survival matrix  $S_t$  with the trap awareness  
15 process matrix  $P$  which takes place between the intermediate time step  $t+1^-$  and  $t+1^+$ . The  
16 different stages are A trap aware, U trap unaware (both have the same survival,  $\phi$ ) and D for  
17 dead. The probability,  $p$  differs between the trap aware and trap unaware stages and captures  
18 the probability to be encountered and become trap aware. The matrix of event  $E$ , is trivial, a  
19 trap-aware individual has necessarily been seen at the previous occasion. From [1].

$$A_{t+1^-} \quad U_{t+1^-} \quad D_{t+1^-}$$

$$S_t = \begin{array}{c|ccc} A_t & \Phi & 0 & 1-\phi \\ U_t & 0 & \Phi & 1-\phi \\ D_t & 0 & 0 & 1 \end{array} \begin{array}{l} \\ \\ \\ \end{array}$$

$$\begin{array}{ccc} A_{t+1^+} & U_{t+1^+} & D_{t+1^+} \end{array}$$

$$P_{t+1} = \begin{array}{c|ccc} A_{t+1^-} & p' & 1-p' & 0 \\ U_{t+1^-} & p & 1-p & 0 \\ D_{t+1^-} & 0 & 0 & 1 \end{array} \begin{array}{l} \\ \\ \\ \end{array}$$

20

"0" "1"

$$E_t = \begin{array}{c|cc} A_t & 0 & 1 \\ U_t & 1 & 0 \\ D_t & 1 & 0 \end{array} \begin{array}{l} \\ \\ \\ \end{array}$$

21

## 22 **Literature**

- 23 1. Pradel, R. & Sanz-Aguilar, A. 2012 Modeling trap-awareness and related  
 24 phenomena in capture-recapture studies. *PLoS One* **7**, 1–4.

25
